# Supplementary material for: Exploring the ion exchange and separation capabilities of thermally stable acrylamide zirconium(iv) sulphosalicylate (AaZrSs) composite material
Source: Royal Society of Chemistry journal article supplement (doi:10.1039/c6ra03077g), 2016-01-01
Supplement: c6ra03077g1.pdf [file c6ra03077g1.pdf]

## Supporting information file

### Exploring the ion exchange and separation capabilities of thermally stable acrylamide zirconium (IV) sulphosalicylate (AaZrSs) composite material

Sozia Ahad, Arshid Bashir, Taniya Manzoor and Altaf Hussain Pandith\*  
Department of Chemistry, University of Kashmir, Srinagar-190006, Kashmir, India

#### Corresponding Author:

#### Altaf Hussain Pandith

Phone: +91-194-2424900(OFFICE)

+91-9906424293 (Mobile)

Fax: +91-194-2414049

E-mail: [altafpandit23@gmail.com](mailto:altafpandit23@gmail.com)

**Table S1** Reproducibility data of different batches of sample No.4 in terms of ion exchange capacity

| <b>Batch No.</b> | <b>Mixing ratio<br/>(v/v/v)</b> | <b>Temperature<br/>(°C)</b> | <b>IEC for Na<sup>+</sup> Ions</b> |
|------------------|---------------------------------|-----------------------------|------------------------------------|
| 1                | 1:1:1                           | 25± 0.5                     | 2.70                               |
| 2                | 1:1:1                           | 25± 0.5                     | 2.69                               |
| 3                | 1:1:1                           | 25± 0.5                     | 2.71                               |
| 4                | 1:1:1                           | 25± 0.5                     | 2.72                               |
| 5                | 1:1:1                           | 25± 0.5                     | 2.72                               |

**Table S2** Elution behavior of 1 g column bed of acrylamide zirconium(IV) sulphosalicylate (AaZrSs)

| <b>volume of effluent in ml</b> | <b>Milli eq.of H<sup>+</sup> ions released</b> |
|---------------------------------|------------------------------------------------|
| 0                               | 0.25                                           |
| 10                              | 0.2                                            |
| 20                              | 0.15                                           |
| 30                              | 0.13                                           |
| 40                              | 0.1                                            |
| 50                              | 0.098                                          |
| 60                              | 0.094                                          |
| 70                              | 0.092                                          |
| 80                              | 0.09                                           |
| 90                              | 0.087                                          |
| 100                             | 0.085                                          |

**Table S3** Effect of temperature on the ion exchange capacity of acrylamide zirconium(IV) sulphosalicylate (AaZrSs) on heating time for 1hour

| <b>Temperature(°C)</b> | <b>IEC</b> | <b>% retention of IEC</b> |
|------------------------|------------|---------------------------|
| 100                    | 2.54       | 94.2                      |
| 200                    | 2.21       | 81.9                      |
| 300                    | 1.89       | 70.2                      |
| 400                    | 1.62       | 60.3                      |
| 500                    | 0.95       | 35.5                      |

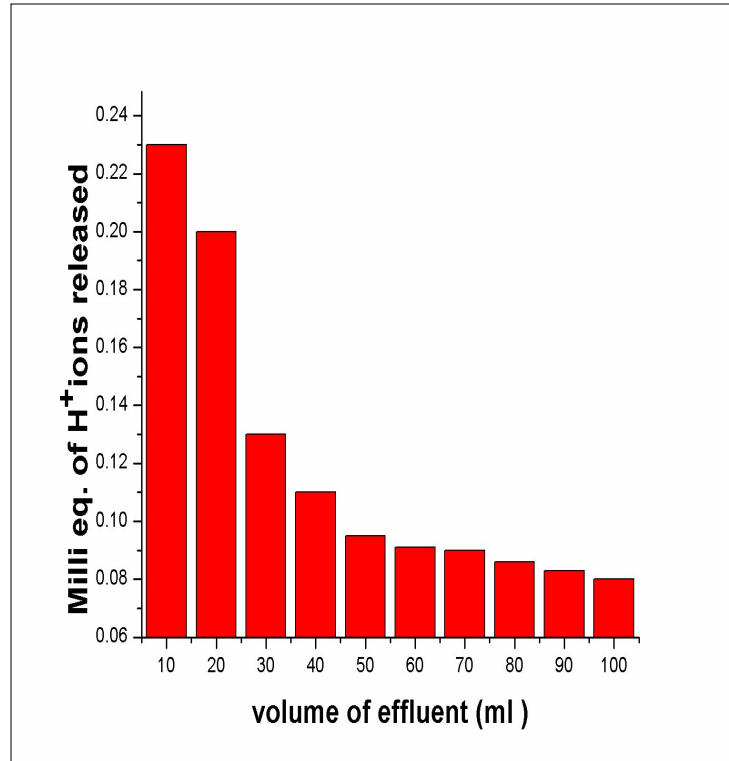

**Fig. S1** Histogram showing elution behaviour of acrylamide zirconium(IV) sulposalicylate (AaZrSs) with 1M sodium Nitrate

**Table S4** Effect of pH on the removal of Cd(II) by hybrid material (AaZrSs). Experimental conditions: dose = 300 mg, contact time = 180 min, stirring speed = 130 rpm

| <b>pH</b> | <b>Amount adsorbed (<math>q_e</math> mg/g)</b> | <b>Removal of Cd(II) (%)</b> |
|-----------|------------------------------------------------|------------------------------|
| 1         | 5.11                                           | 37.38                        |
| 2         | 5.82                                           | 43.08                        |
| 3         | 8.48                                           | 65.38                        |
| 4         | 10.84                                          | 83.23                        |
| 5         | 12.29                                          | 94.81                        |
| 6         | 12.32                                          | 98.77                        |
| 6.5       | 12.35                                          | 98.87                        |
| 7         | 12.35                                          | 98.87                        |
| 8         | 12.35                                          | 98.87                        |
| 9         | 11.82                                          | 96.34                        |
| 10        | 10.55                                          | 94.42                        |
| 11        | 9.54                                           | 92.47                        |

**Table S5** Effect of adsorbent dose (AaZrSs) on % removal of Cd (II). Experimental conditions: Cd(II) = 100ppm, contact time = 180 min, stirring speed = 130 rpm, pH = 6.5

| <b>Adsorbent dose (g)</b> | <b>Amount adsorbed ( <math>q_e</math> mg/g)</b> | <b>Removal of Cd(II) (%)</b> |
|---------------------------|-------------------------------------------------|------------------------------|
| 0.1                       | 9.90                                            | 37.67                        |
| 0.15                      | 10.07                                           | 47.75                        |
| 0.2                       | 10.75                                           | 61.27                        |
| 0.25                      | 11.45                                           | 76.37                        |
| 0.3                       | 12.93                                           | 91.56                        |
| 0.35                      | 12.98                                           | 96.88                        |

**Table S 6** Effect of initial concentration of Cd (II) on % removal. Experimental conditions: dose = 300 mg, contact time = 180 min, stirring speed= 130 rpm, pH= 6.5

| <b>Initial Conc. Cd(II) (ppm)</b> | <b>Amount adsorbed (<math>q_e</math> mg/g)</b> | <b>Removal of Cd(II) (%)</b> |
|-----------------------------------|------------------------------------------------|------------------------------|
| 100                               | 12.97                                          | 99.42                        |
| 120                               | 15.17                                          | 97.65                        |
| 140                               | 17.21                                          | 95.42                        |
| 160                               | 19.10                                          | 93.00                        |
| 180                               | 19.45                                          | 84.29                        |
| 200                               | 20.84                                          | 81.51                        |
| 220                               | 21.60                                          | 76.93                        |
| 240                               | 22.09                                          | 72.17                        |
| 260                               | 23.26                                          | 69.17                        |
| 280                               | 23.34                                          | 69.09                        |



**Table S7** Effect of contact time on % removal of Cd (II). Experimental conditions: Cd(II) = 100ppm, stirring speed = 130 rpm, pH = 6.5, dose = 300 mg

| <b>Time(min)</b> | <b>Amount adsorbed ( <math>q_t</math> mg/g)</b> | <b>Removal of Cd(II) (%)</b> |
|------------------|-------------------------------------------------|------------------------------|
| 30               | 4.20                                            | 32.00                        |
| 45               | 6.78                                            | 52.70                        |
| 60               | 8.02                                            | 62.64                        |
| 90               | 10.58                                           | 82.44                        |
| 120              | 11.57                                           | 91.00                        |
| 150              | 12.06                                           | 94.94                        |
| 180              | 12.57                                           | 99.02                        |
| 210              | 12.57                                           | 99.02                        |

**Table S8** Lagergren first order for Cd(II) adsorption on AaZrSs

| <b>Time(min)</b> | <b><math>\log(q_e - q_t)</math></b> |
|------------------|-------------------------------------|
| 30               | 0.8237                              |
| 60               | 0.6637                              |
| 90               | 0.568                               |
| 120              | 0.1999                              |
| 180              | -0.0054                             |

**Table S9** Pseudo second order for Cd(II) adsorption on AaZrSs

| <b>Time (min)</b> | <b>t/q<sub>t</sub></b> |
|-------------------|------------------------|
| 30                | 7.6387                 |
| 60                | 9.2474                 |
| 90                | 11.1125                |
| 120               | 11.9993                |
| 180               | 15.9550                |

**Table S 10** Effect of temperature on amount adsorbed of Cd(II) on AaZrSs

| <b>T (°C)</b> | <b>q<sub>e</sub> (mg/g)</b> |
|---------------|-----------------------------|
| 30            | 29.680                      |
| 35            | 33.573                      |
| 40            | 39.740                      |
| 45            | 42.232                      |
| 50            | 45.921                      |

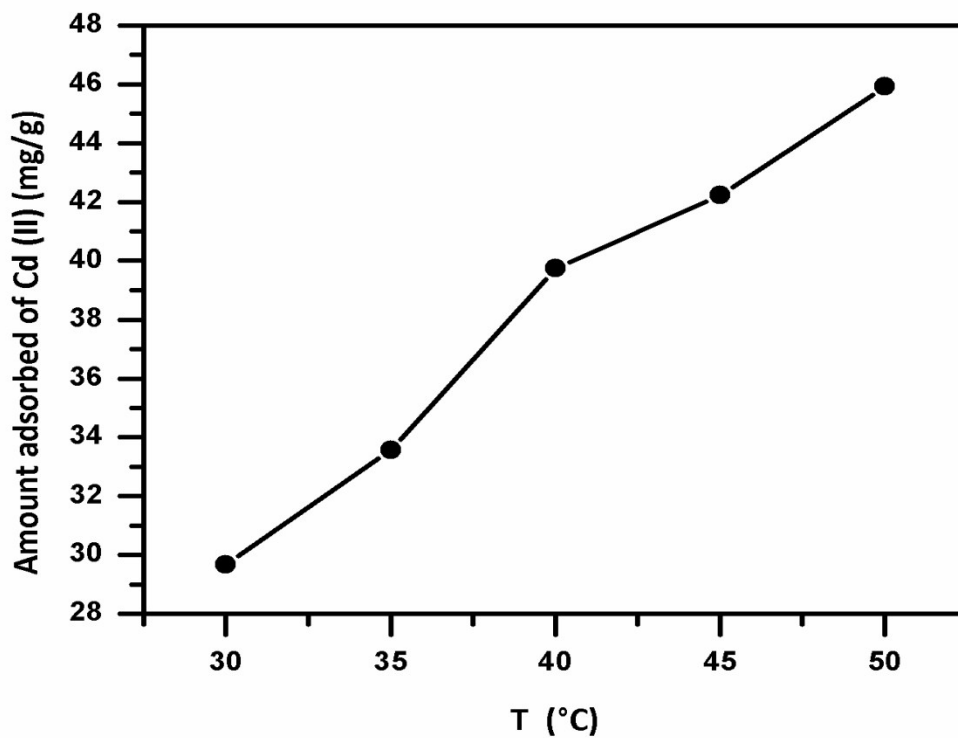

**Fig. S2** Effect of temperature on the amount of Cd(II) adsorbed by the hybrid material: acrylamide zirconium(IV)sulphosalicylate (AaZrSs). Experimental conditions: adsorbent dose = 300mg, pH = 6.5, contact time = 180 min and stirring speed = 130 rpm

**Table S11** Langmuir isotherm for adsorption of Cd(II) on AaZrSs

| $C_e$  | $C_e/q_e$ |
|--------|-----------|
| 103.15 | 5.1307    |
| 111.3  | 5.2083    |
| 126.45 | 5.6775    |
| 142.4  | 6.1738    |
| 161.27 | 6.8344    |
| 180.54 | 7.5145    |
| 199.92 | 8.1968    |

**Table S12** Freundlich isotherm for adsorption of Cd(II) on AaZrSs

| <b>log C<sub>e</sub></b> | <b>log q<sub>e</sub></b> |
|--------------------------|--------------------------|
| 2.0134                   | 1.3923                   |
| 2.0464                   | 1.4158                   |
| 2.1019                   | 1.4257                   |
| 2.1535                   | 1.4356                   |
| 2.2075                   | 1.4377                   |
| 2.2565                   | 1.4423                   |
| 2.3008                   | 1.4425                   |
